# Supplementary material for: Clinical outcome following checkpoint therapy in renal cell carcinoma is associated with a burst of activated CD8 T cells in blood
Source: PubMed Central journal article supplement — J Immunother Cancer. 2022 Jul 21;10(7):e004803. doi: 10.1136/jitc-2022-004803 (PMC9310235; doi:10.1136/jitc-2022-004803), 2022-07-21
Supplement: jitc-2022-004803supp001.pdf [file jitc-2022-004803supp001.pdf]

**A**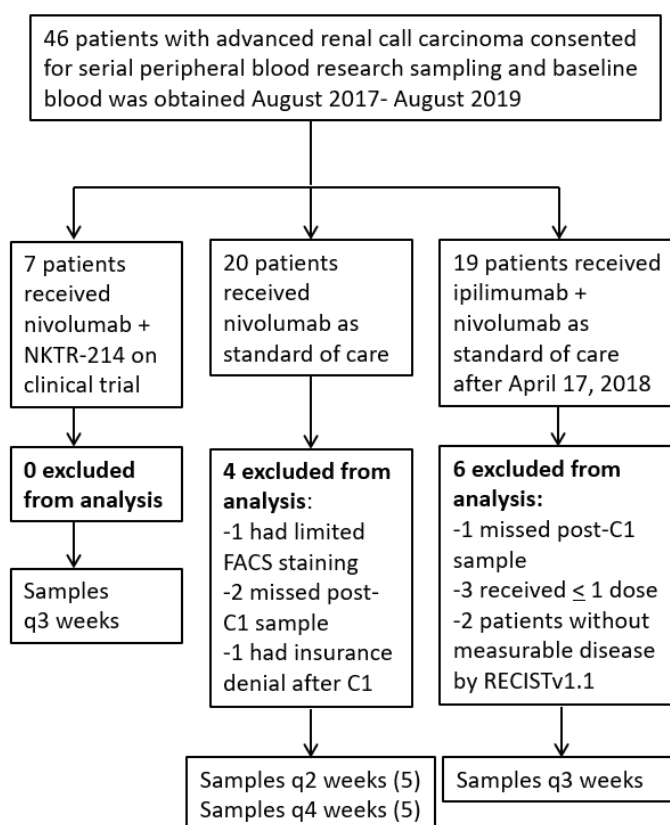**B**

|                                                            | <b>Total Number<br/>(n=36)</b> |
|------------------------------------------------------------|--------------------------------|
| Median age, years (range)                                  | 58 (33-78)                     |
| Male                                                       | 24 (67%)                       |
| Race: Caucasian                                            | 24 (89%)                       |
| African American                                           | 6 (17%)                        |
| Histology: pure clear cell                                 | 27 (75%)                       |
| + sarcomatoid features                                     | 5 (14%)                        |
| Papillary + clear cell                                     | 1 (3%)                         |
| Chromophobe + clear cell                                   | 1 (3%)                         |
| Collecting duct                                            | 1 (3%)                         |
| Unclassified                                               | 1 (3%)                         |
| Former or current smoker                                   | 24 (67%)                       |
| Lung metastasis at baseline either > 1 cm or biopsy proven | 20 (56%)                       |
