# Supplementary figures and images for: Clinical outcome following checkpoint therapy in renal cell carcinoma is associated with a burst of activated CD8 T cells in blood
Source: PubMed Central journal article supplement — J Immunother Cancer. 2022 Jul 21;10(7):e004803. doi: 10.1136/jitc-2022-004803 (PMC9310235; doi:10.1136/jitc-2022-004803), 2022-07-21

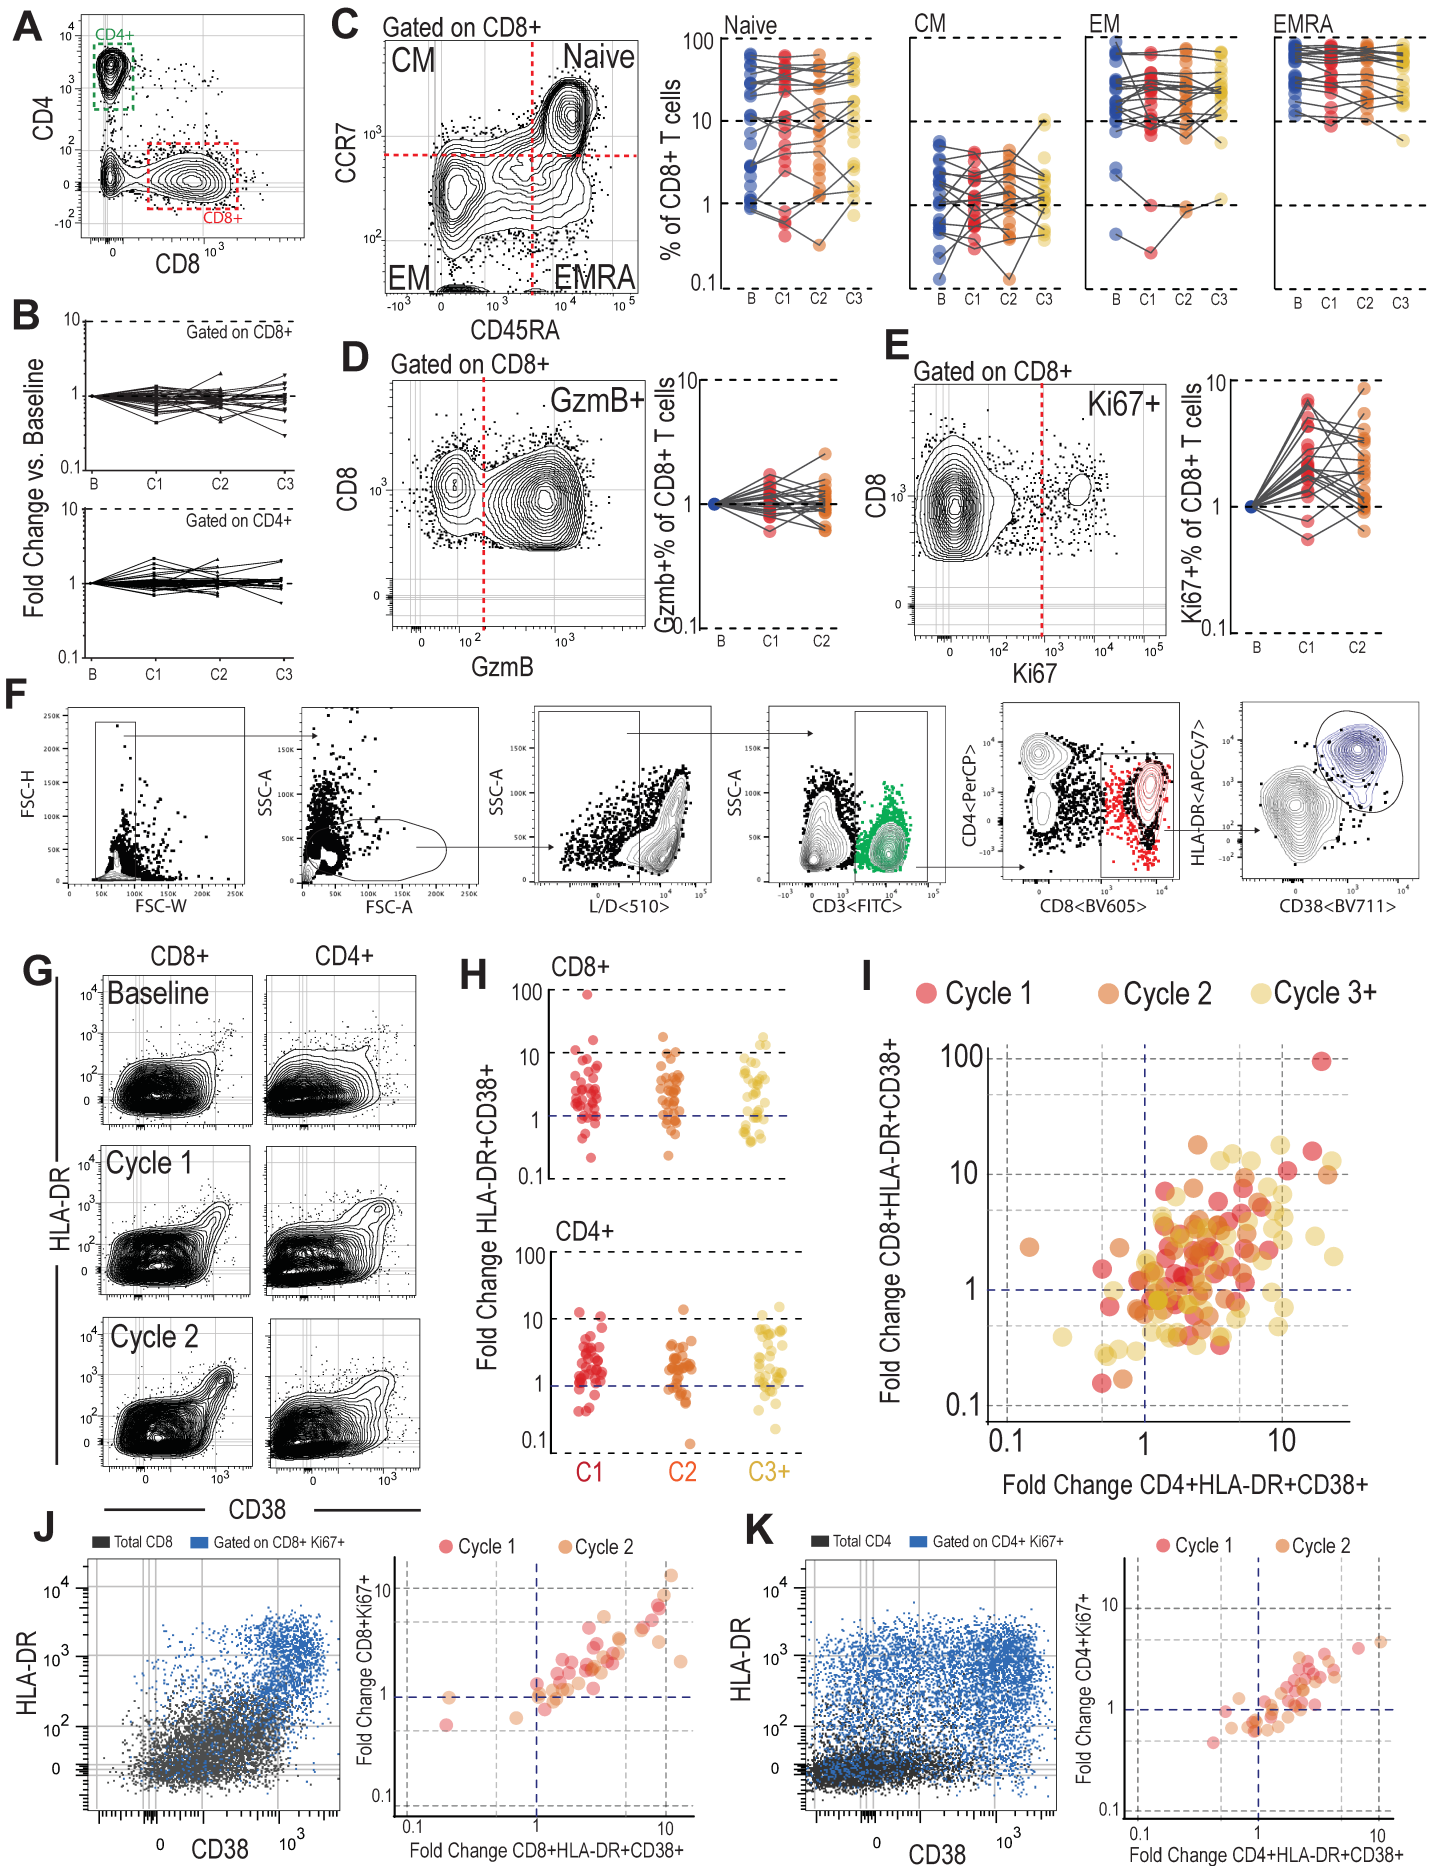

Supplement: jitc-2022-004803supp002.pdf [file jitc-2022-004803supp002.pdf]

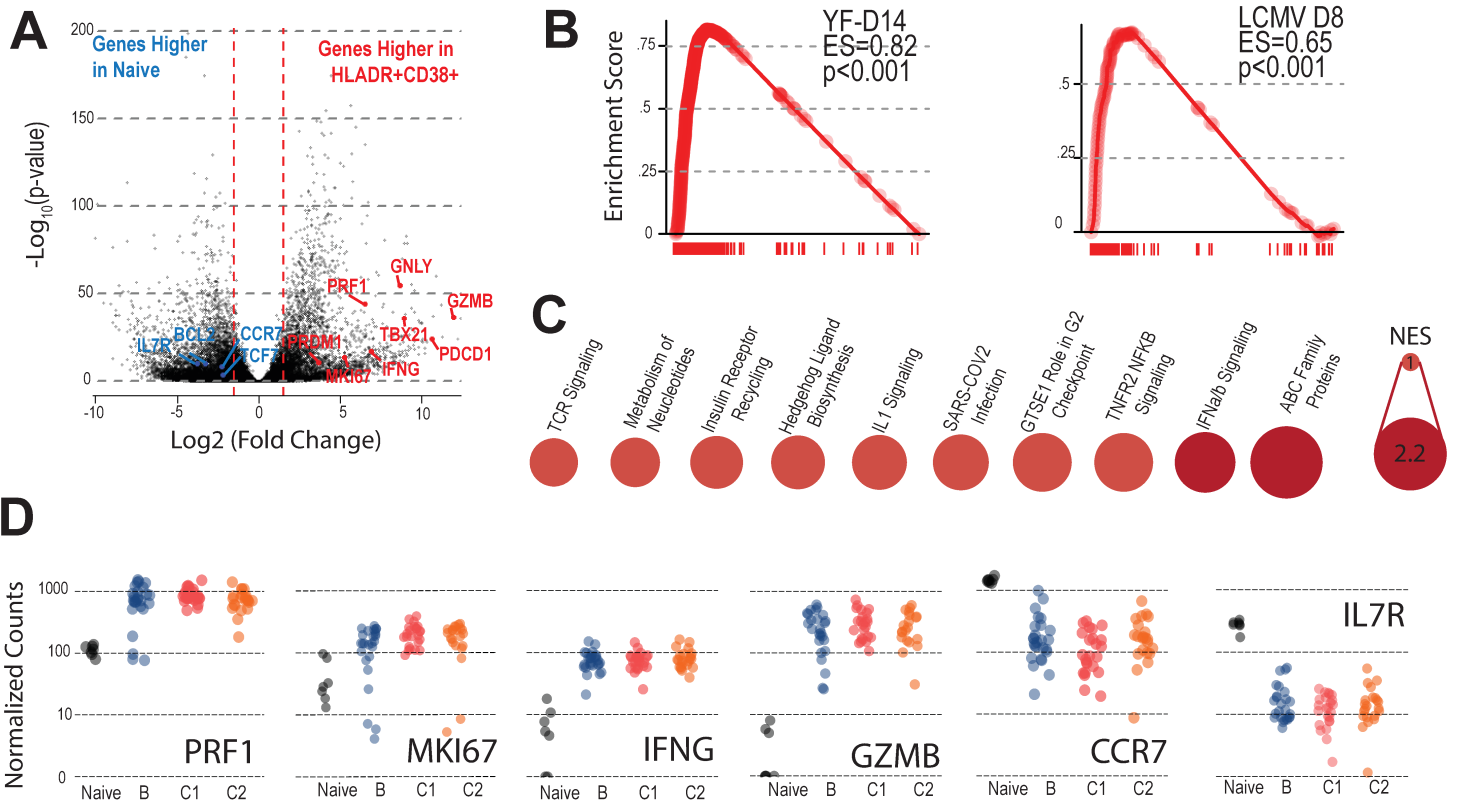

Supplement: jitc-2022-004803supp003.pdf [file jitc-2022-004803supp003.pdf]

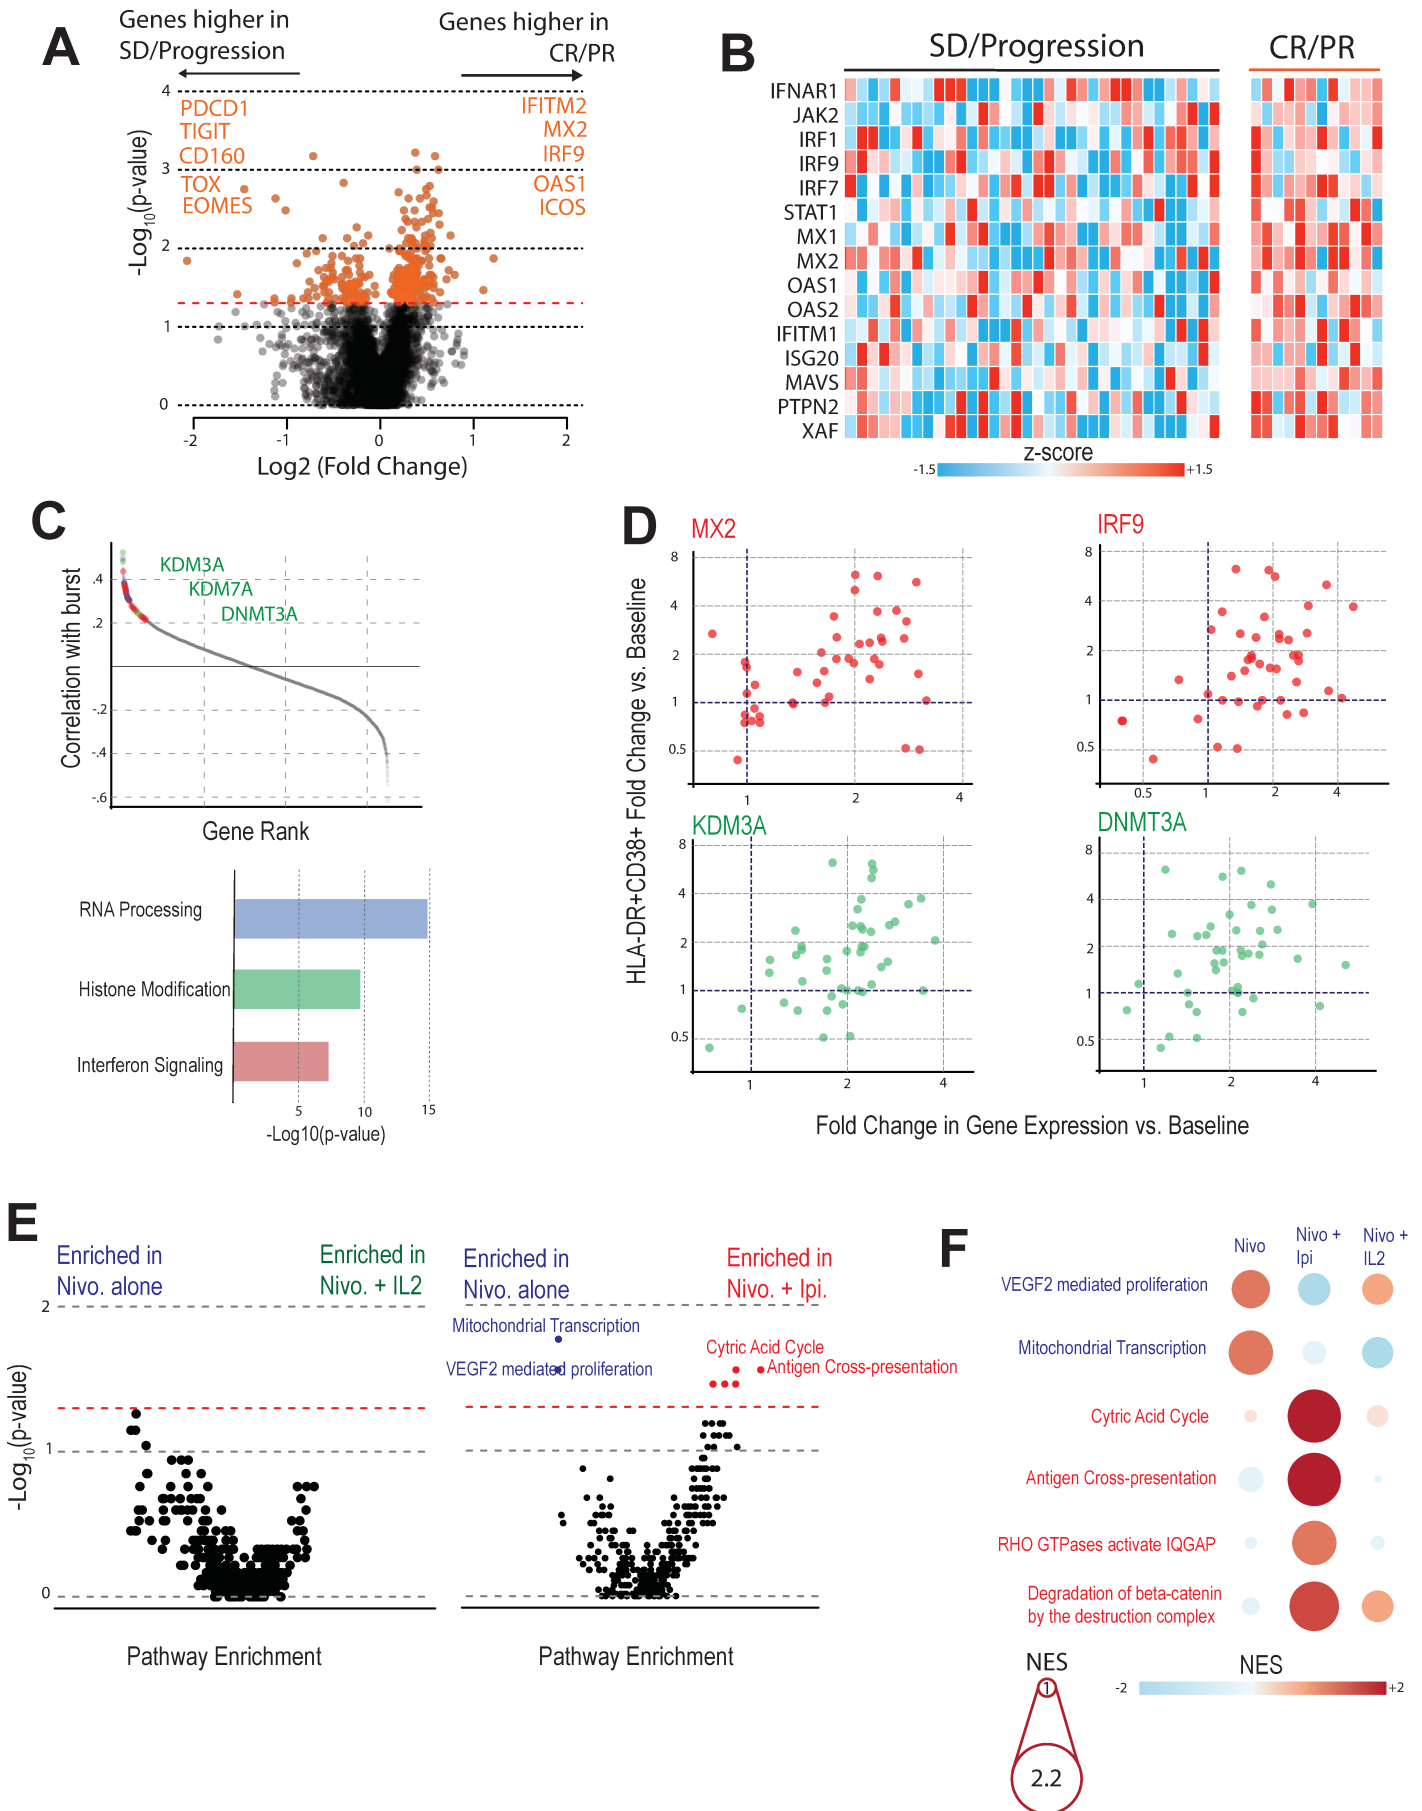

Supplement: jitc-2022-004803supp004.pdf [file jitc-2022-004803supp004.pdf]

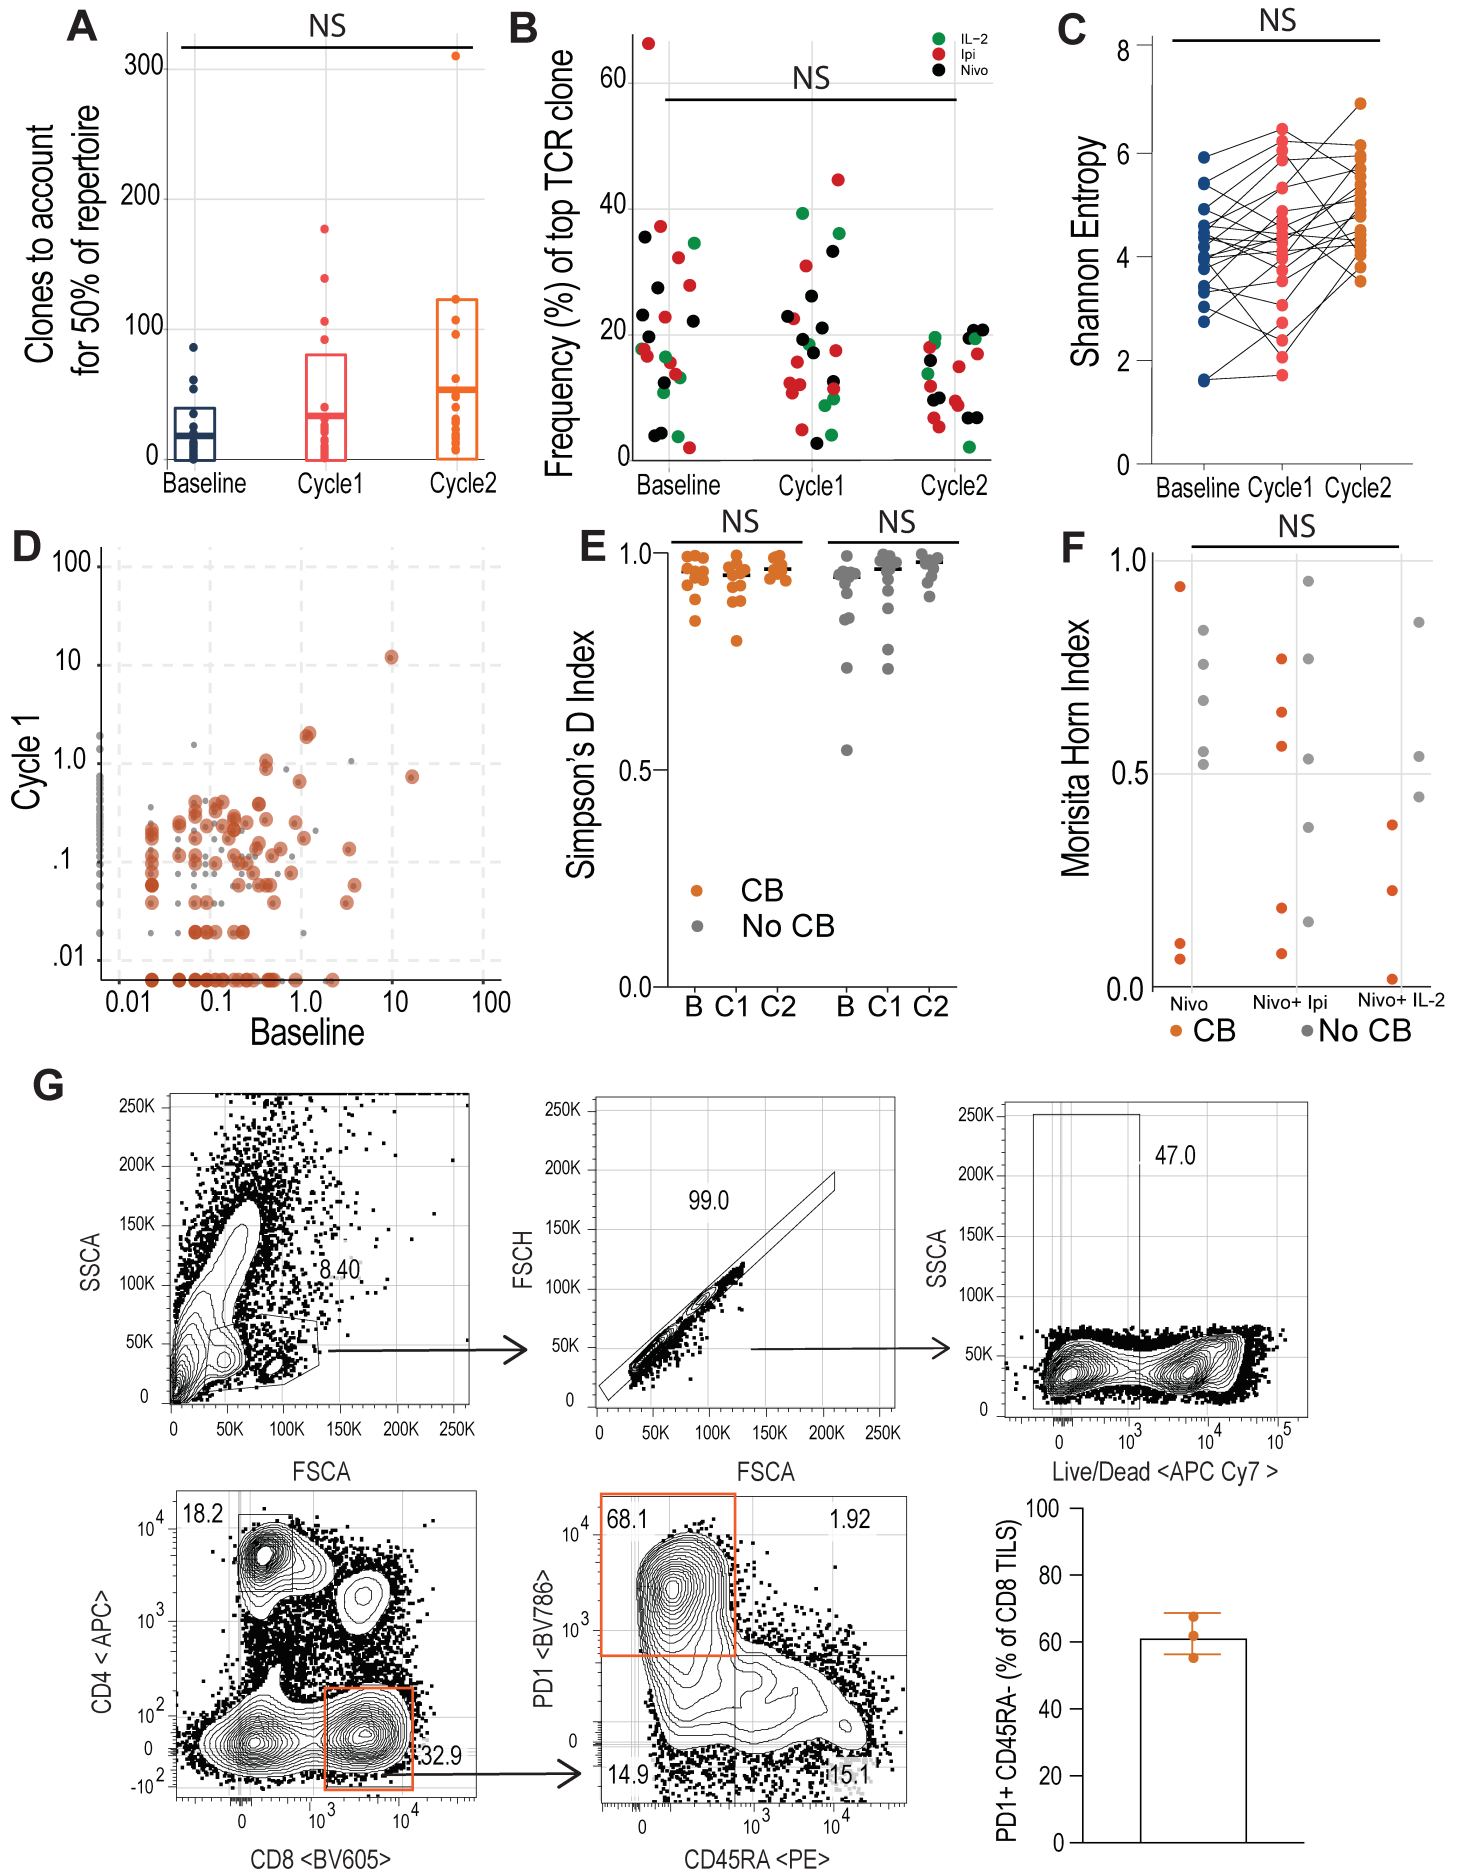

Supplement: jitc-2022-004803supp005.pdf [file jitc-2022-004803supp005.pdf]

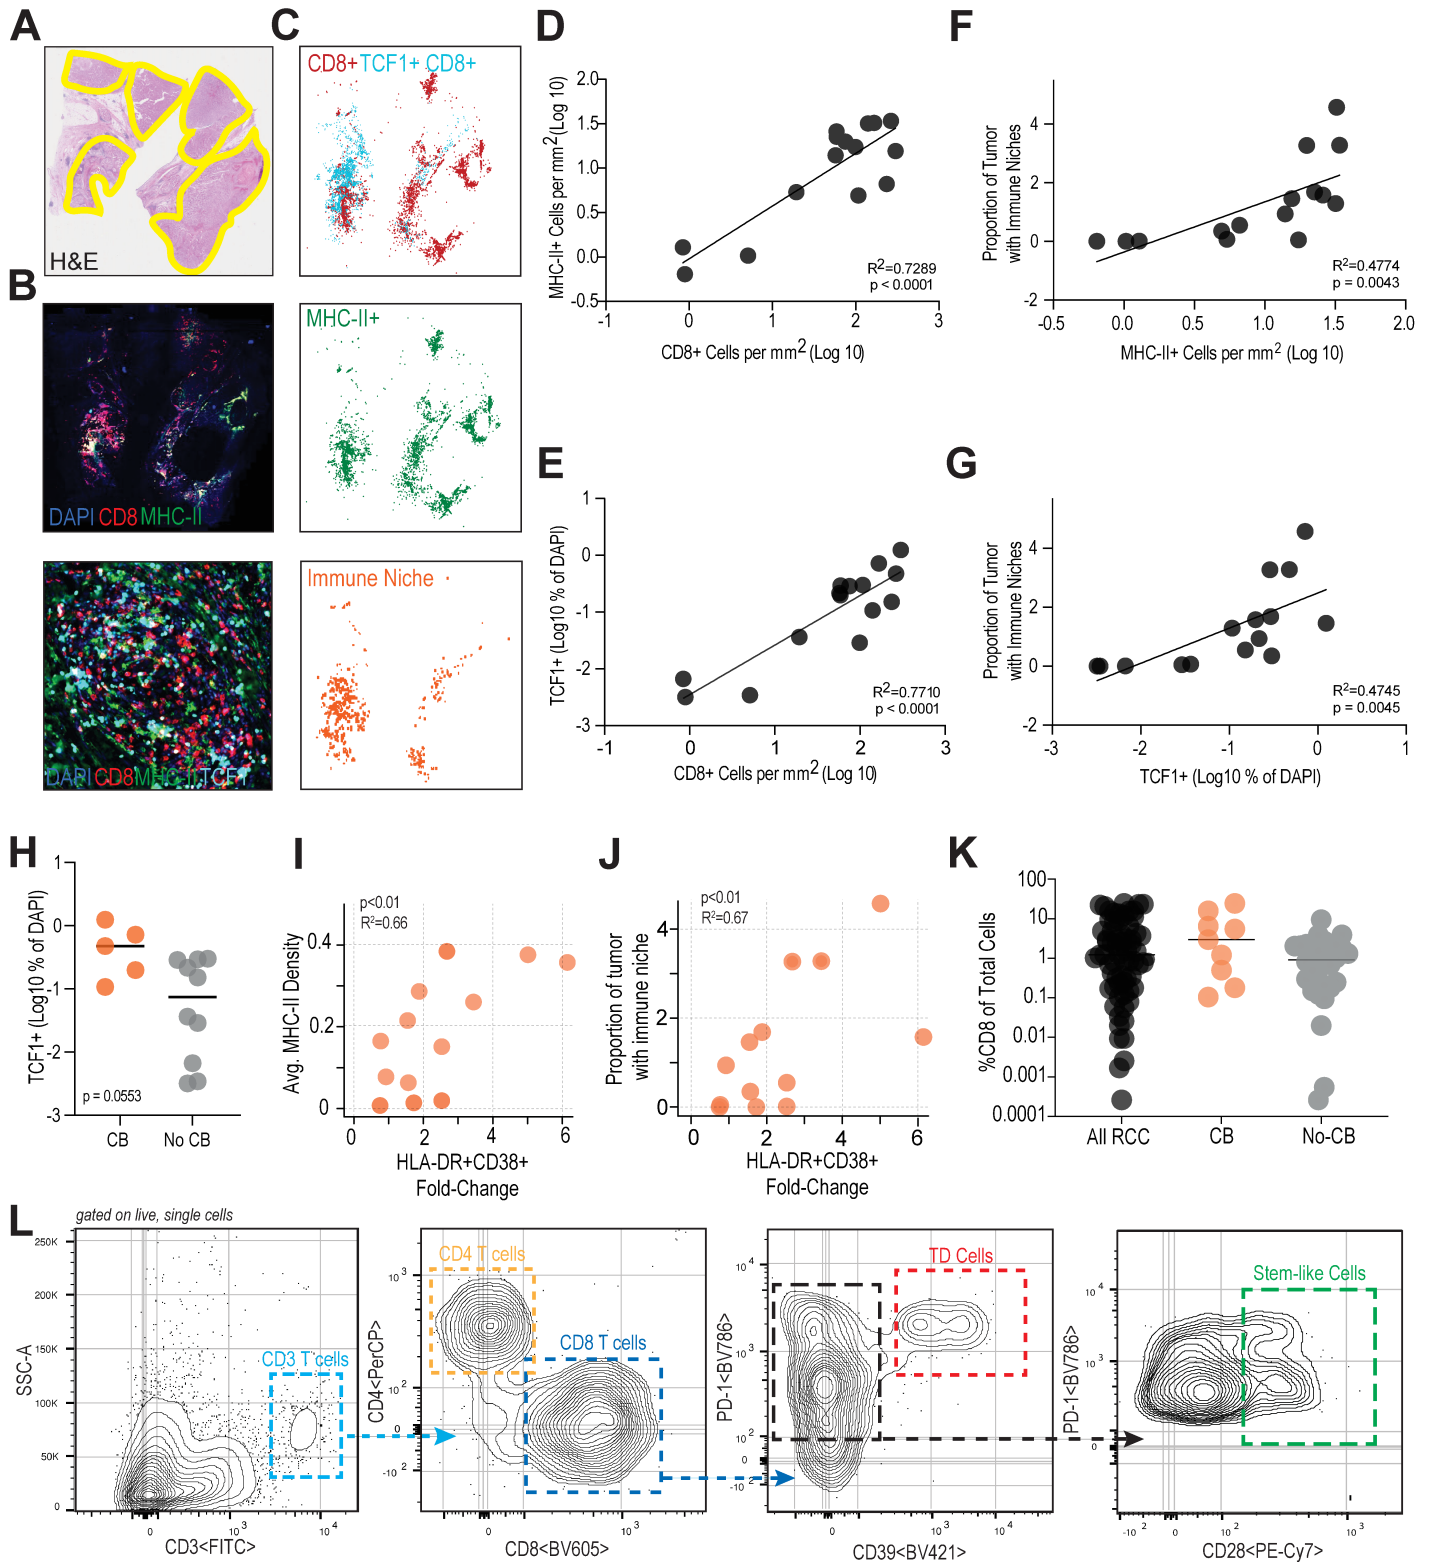

Supplement: jitc-2022-004803supp006.pdf [file jitc-2022-004803supp006.pdf]
